# Supplementary material
Source: HighWire-hosted journal article supplement (http://molpharm.aspetjournals.org/highwire/filestream/77088/field_highwire_adjunct_files/0/supplement_figure1.pdf)
Supplement: supplement_figure1.pdf [file supplement_figure1.pdf]

# Molecular Pharmacology

Mithramycin A inhibits myeloid cell leukemia-1 to induce apoptosis in oral squamous cell carcinomas and tumor xenograft through activation of Bax and oligomerization

Ji-Ae Shin, Ji-Youn Jung, Mi Heon Ryu, Stephen Safe, and Sung-Dae Cho

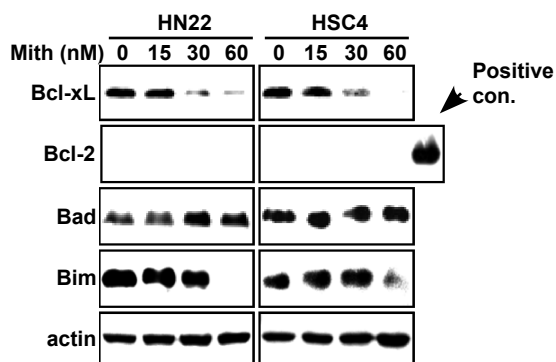

**Supplement Figure.** Other Bcl-2 family member protein expression (Bcl-xL, Bcl-2, Bad, and Bim) in HN22 and HSC4 cells treated with DMSO or various concentrations (15, 30, 60 nM) of Mith was determined by Western blots. Positive control is a cell lysate from KB human cervical cancer cells.
